# Supplementary material for: A major role of insulin in promoting obesity-associated adipose tissue inflammation
Source: PubMed Central journal article supplement — Mol Metab. 2015 May 1;4(7):507–18. doi: 10.1016/j.molmet.2015.04.003 (PMC4481426; doi:10.1016/j.molmet.2015.04.003), 2015-05-01
Supplement: mmc1.pdf [file mmc1.pdf]

| Characteristic                         | Mean              | Range   |
|----------------------------------------|-------------------|---------|
| Sex                                    |                   |         |
| Male (n)                               | 8                 |         |
| Female (n)                             | 28                |         |
| Age(y)                                 | 41.40 (+/- 1.35)  | 31-57   |
| Weight                                 | 291.08 (+/- 9.05) | 206-413 |
| BMI                                    | 46.61 (+/- 1.02)  | 38-60   |
| Fasting Glucose<br>(mg/dL)             | 96.33 (+/-2.12)   | 82-129  |
| Fasting<br>specific insulin<br>(mIU/L) | 16.22 (+/-2.83)   | 3-103   |
| HOMA2                                  | 2.18 (+/- 0.24)   | 0.4-6.7 |

Data presented as a mean +/- standard error of the mean.
