# Supplementary figures and images for: A major role of insulin in promoting obesity-associated adipose tissue inflammation
Source: PubMed Central journal article supplement — Mol Metab. 2015 May 1;4(7):507–18. doi: 10.1016/j.molmet.2015.04.003 (PMC4481426; doi:10.1016/j.molmet.2015.04.003), 2015-05-01

**A**

Random

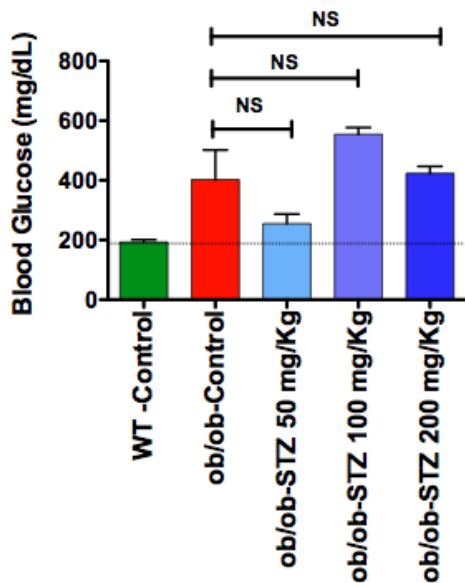**B**

Fasting

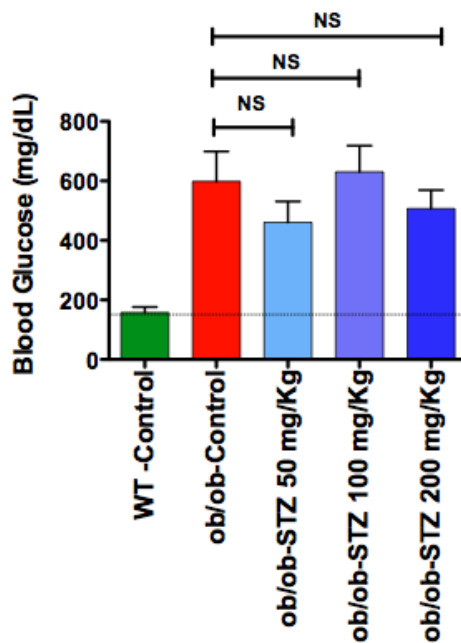**C**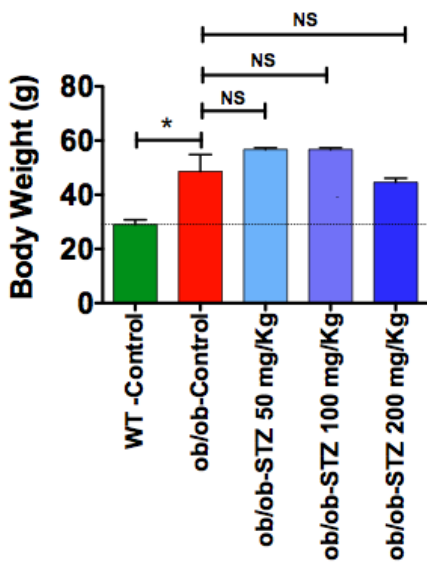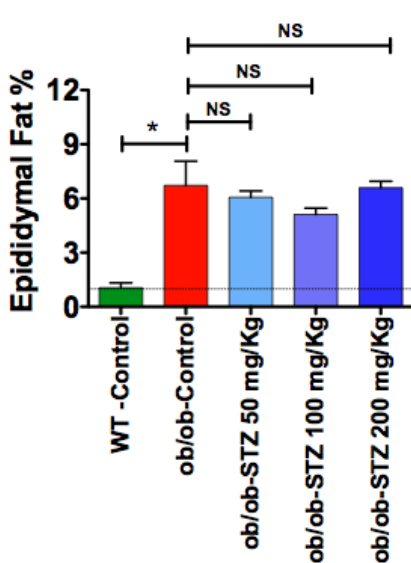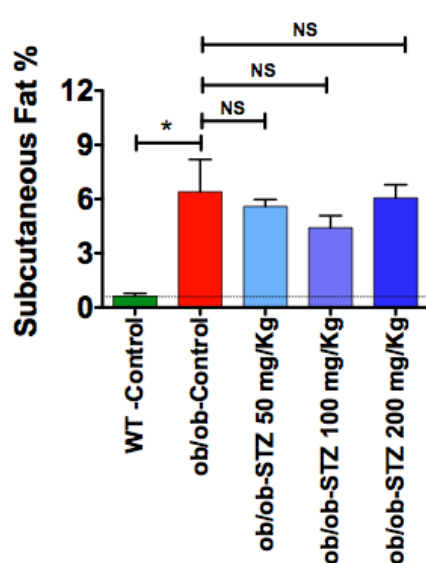

Figure S1

Supplement: mmc2.pdf [file mmc2.pdf]

**A** **Ccl2**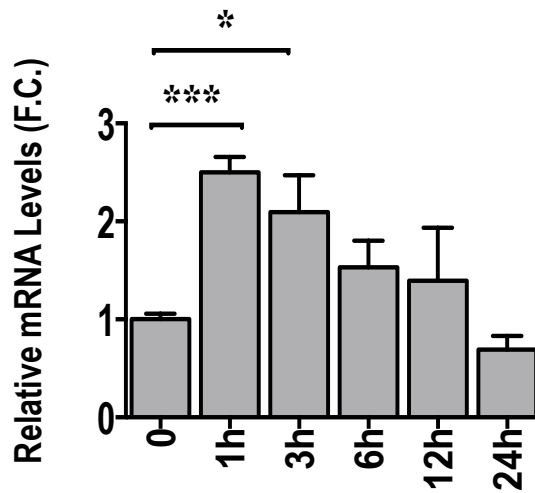**B****Relative mRNA Levels (F.C.)****Mlxipl**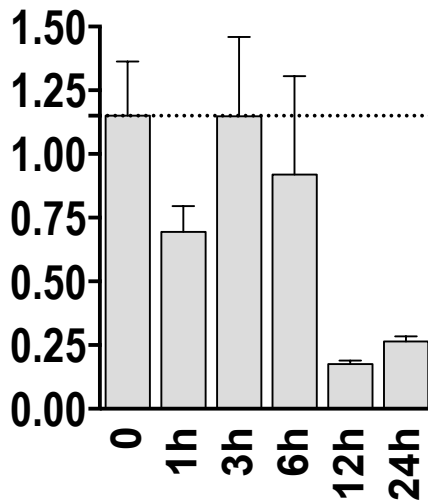**Slc2a4**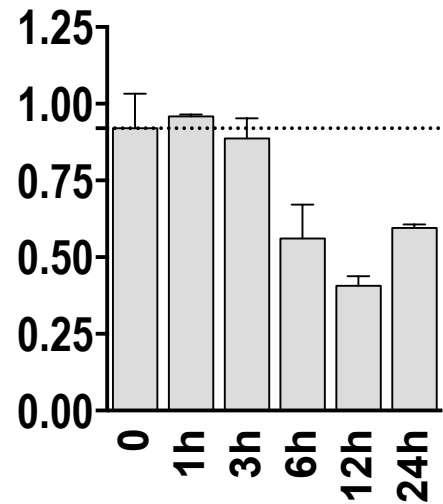**Pck1**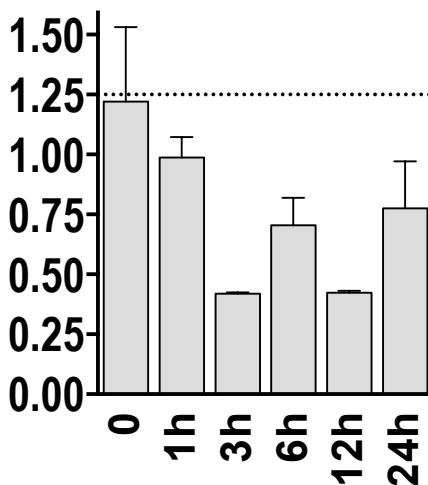**Pdk4**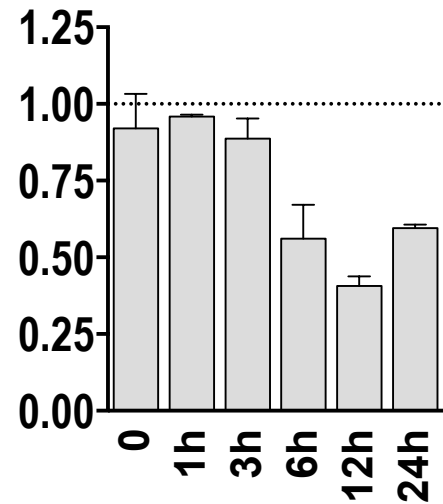

Supplement: mmc3.pdf [file mmc3.pdf]

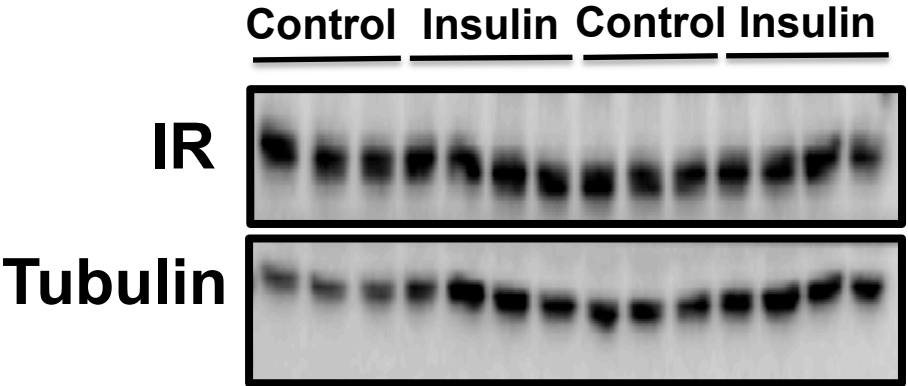

Figure S3

Supplement: mmc4.pdf [file mmc4.pdf]
